# Supplementary material for: Encapsulation of lipase in mesoporous silica yolk–shell spheres with enhanced enzyme stability
Source: Royal Society of Chemistry journal article supplement (doi:10.1039/c3ra43382j), 2013-01-01
Supplement: c3ra43382j.pdf [file c3ra43382j.pdf]

# Encapsulation of lipase in mesoporous silica yolk-shell spheres with enhanced stability

Zheng Yang Zhao,<sup>a</sup> Jian Liu,<sup>\*b</sup> Mandy Hahn,<sup>a</sup> Shi Zhang Qiao<sup>\*c</sup>, Anton P.J. Middelberg,<sup>c</sup> and Lizhong He<sup>\*a</sup>

<sup>a</sup>*Department of Chemical Engineering, Monash University, Clayton, VIC3800, Australia,  
Email: [lizhong.he@monash.edu](mailto:lizhong.he@monash.edu)*

<sup>b</sup>*Department of Chemical Engineering, Curtin University, Perth WA 6845, Australia. Tel:  
+61 8 92662522; E-mail: [jian.liu@curtin.edu.au](mailto:jian.liu@curtin.edu.au)*

<sup>c</sup>*School of Chemical Engineering, The University of Adelaide, Adelaide, SA5005, Australia.  
E-mail: [s.qiao@adelaide.edu.au](mailto:s.qiao@adelaide.edu.au)*

<sup>d</sup>*Centre for Biomolecular Engineering, Australian Institute for Bioengineering and  
Nanotechnology and School of Engineering, The University of Queensland, St Lucia,  
Brisbane, QLD 4072 Australia*

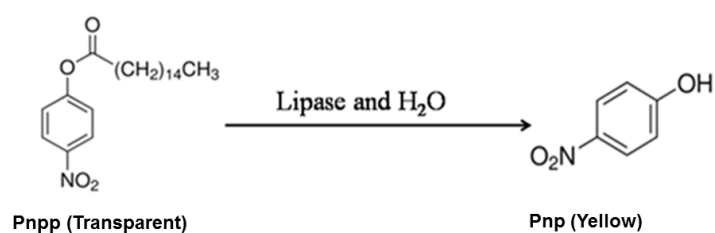

**Figure S1.** Hydrolysis reaction for activity test of lipase.

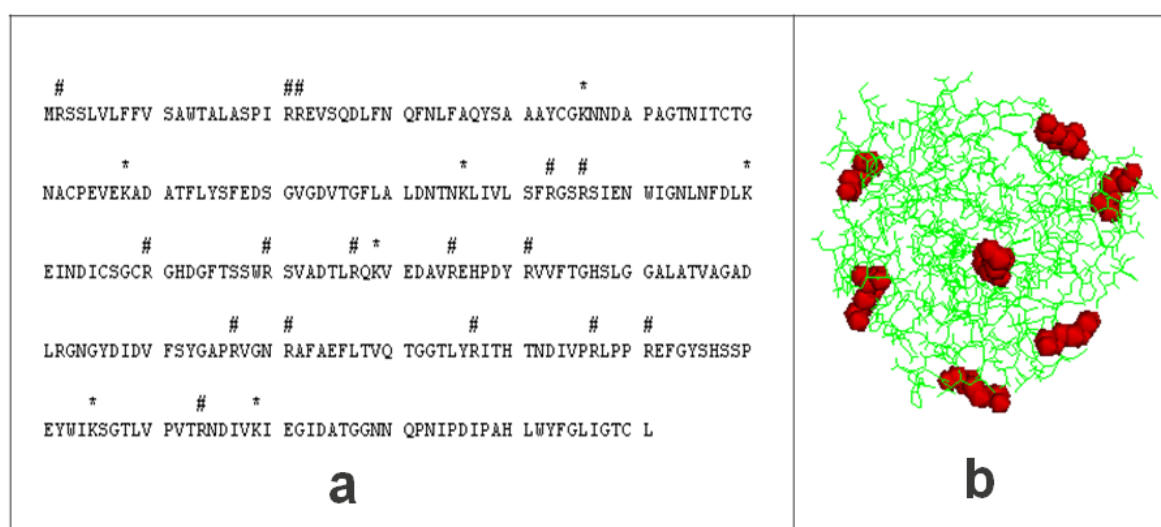

**Figure S2 a:** Amino acid sequence of lipase (UniProtKB Accession No. 059952). Lysine residue is labelled with “\*” upon the representative letter, K. The Proteinase K cleavage site is labelled with “#” sign upon the representative letter, R. The cleavage site information was obtained from ExPASy-PeptideCutter. **b:** Positions of lysine residues on lipase surface. The red spheres indicate the position of lysine residue. The picture was constructed with Pymol V1.5.

**Table S1.** Specific activity of free and encapsulated lipases

| Samples     | Specific activity per unit<br>weight of lipase<br>[U.mg <sup>-1</sup> ] | Specific activity after<br>thermal treatment<br>[U.mg <sup>-1</sup> ] | Specific activity after<br>Proteinase K treatment<br>[U.mg <sup>-1</sup> ] |
|-------------|-------------------------------------------------------------------------|-----------------------------------------------------------------------|----------------------------------------------------------------------------|
| Free lipase | 4.7                                                                     | 0.024                                                                 | undetectable                                                               |
| LEMSYS      | 0.75                                                                    | 0.66                                                                  | 0.56                                                                       |

The concentration of lipase encapsulated in mesoporous silica yolk-shell sphere was 11 mg/g silica sphere. The specific activities of free and encapsulated lipase under different conditions are summarized in Table S1 for comparison.
